# Supplementary figures and images for: Hypoglycemic and Antioxidant Properties of Extracts and Fractions from Polygoni Avicularis Herba
Source: MDPI journal article supplement (doi:10.3390/molecules27113381), 2022-05-24

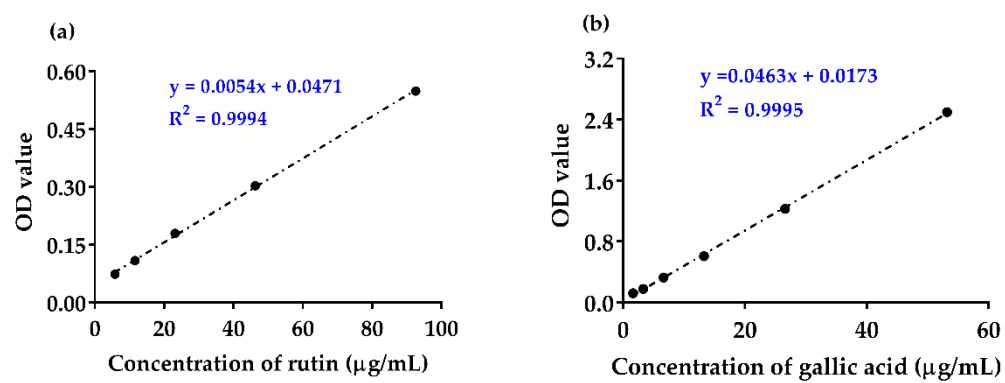

**Figure. S1** Linear fit results of rutin and gallic acid.

Supplement: s1 [file s1]
